# Supplementary material
Source: MDPI journal article supplement (https://www.mdpi.com/1999-4915/8/7/188)
Supplement: s1 [file s1]

Archive with 3 entries (3 files):
- Table S1.xlsx
- Table S2.xlsx
- viruses-08-00188-s001-2.pdf
