# Supplementary material for: A Sequence-Independent Strategy for Amplification and Characterisation of Episomal Badnavirus Sequences Reveals Three Previously Uncharacterised Yam Badnaviruses
Source: MDPI journal article supplement (doi:10.3390/v8070188), 2016-07-07
Supplement: s1 [file s1 › Table S1.xlsx]

## Sheet: Sheet1
Table S1 Primers used to clone DBRTV1, DBRTV2 and DBALV-[3RT] genomes
Name	Sequence (5'-3')	Location	Amplicon size (bp)
DBRTV1-F	GGAAGGCCCTTTTCGTTGAT	5068-5087a	5808b
DBRTV1-R	TGATGAGTCGACCCAACCAA	6986-7005a
DBRTV1-F2	AGCTGCGAACTGGAAATTCA	4693-4712a	2553b
DBRTV1-R2	TCGGCCCACTGATTATCTCC	7227-7246a
DBRTV2-F	TGTGTTACAGCTCAAGGGTTTT	7226-7247c	5657d
DBRTV2-R	ACTATGAATGCCGTCGTCCT	5425-5444c
DBRTV2-F2	CGATGCTTTGCTGGAGTTGA	5376-5395e	1911d
DBRTV2-R2	GTTCTACAACTTCGGTGTTACC	7265-7286e
DBALV-[3RT]-F	CAAGGGGAGTCAAATGGTGT	1932-1951	1977
DBALV-[3RT]-R	TCCGATAGTGTTTCCGGCAT	3890-3909
a Location of the primer on the genomic sequence of DBRTV1-[2RT] and DBRTV1-[3RT]
b Length of the amplicon for DBRTV1-[2RT]
c Location of the primer on the genomic sequence of DBRTV2
d Length of the amplicon for DBRTV2
e Location of the primer on the genomic sequence of DBRTV2
