# Supplementary material for: A Sequence-Independent Strategy for Amplification and Characterisation of Episomal Badnavirus Sequences Reveals Three Previously Uncharacterised Yam Badnaviruses
Source: MDPI journal article supplement (doi:10.3390/v8070188), 2016-07-07
Supplement: s1 [file s1 › Table S2.xlsx]

## Sheet: Sheet1
Table S2 Comparison of genome features of eleven yam badnavirus genomes.
Species	Genome	ORF1				ORF2				ORF3				Transcriptional elements
	Length (bp)	Length	Start-stop (frame)	Amino	Protein	Length	Start-stop (frame)	Amino	Protein	Length	Start-stop (frame)	Amino	Protein	TATA-box		Poly(A)-tail
	(% G + C)	(bp)	(codon use)	Acids	(kDa)	(bp)	(codon use)	Acids	(kDa)	(bp)	(codon use)	Acids	(kDa)	(position)	<gap>	(position)
DBALV	7413	432	467-898 (+2)	143	16.88	378	895-1272 (+1)	125	13.97	5685	1272-6956 (+3)	1894	214.62	7267-7273	<56>	7330-7335
	43.4		(atg-tga)				(atg-taa)				(atg-tga)			gccTATATAAgca		aataaa
DBALV-[2ALa]	7544	432	591-1022 (+3)	143	16.77	378	1019-1396 (+2)	125	13.89	5694	1396-7089 (+1)	1897	214.69	7402-7408	<55>	7464-7469
	43.8		(atg-tga)				(atg-taa)				(atg-tga)			ggcTATATAAgca		aataaa
DBALV-[2ALb]	7544	432	591-1022 (+3)	143	16.77	378	1019-1396 (+2)	125	13.89	5694	1396-7089 (+1)	1897	214.73	7402-7408	<55>	7464-7469
	43.9		(atg-tga)				(atg-taa)				(atg-tga)			ggcTATATAAgca		aataaa
DBRTV1	7702	429	576-1004 (+3)	142	16.68	372	1001-1372 (+2)	123	13.85	5760	1369-7128 (+1)	1919	217.1	7539-7545	<31>	7577-7582
	42.7		(atg-tga)				(atg-tga)				(atg-tga)			ttcTATATAAgac		aaaata
DBRTV1-[2RT]	7707	429	576-1004 (+3)	142	16.68	372	1001-1372 (+2)	123	13.82	5766	1369-7134 (+1)	1921	217.26	7545-7551	<31>	7583-7588
	42.7		(atg-tga)				(atg-tga)				(atg-tga)			ttcTATATAAgac		aaaata
DBRTV1-[3RT]	7708	429	576-1004 (+3)	142	16.68	372	1001-1372 (+2)	123	13.85	5766	1369-7134 (+1)	1921	217.35	7545-7551	<31>	7583-7588
	42.7		(atg-tga)				(atg-tga)				(atg-tga)			ttcTATATAAgac		aaaata
DBRTV2	7438	429	393-821 (+3)	142	16.58	366	818-1183 (+2)	121	13.52	5682	1180-6861 (+1)	1893	213.65	7253-7259	<100>	7360-7365
	44.2		(atg-tga)				(atg-tga)				(atg-tga)			gccTATATAAgta		aataaa
DBRTV2-[2RT]	7462	429	395-823 (+2)	142	16.51	366	820-1185 (+1)	121	13.5	5679	1182-6860 (+3)	1892	213.63	7288-7294	<95>	7390-7395
	44.3		(atg-tga)				(atg-tga)				(atg-tga)			gccTATATAAgta		aataaa
DBRTV2-[3RT]	7438	429	393-821 (+3)	142	16.58	366	818-1183 (+2)	121	13.43	5682	1180-6861 (+1)	1893	213.71	7253-7259	<100>	7360-7365
	44.3		(atg-tga)				(atg-tga)				(atg-tga)			gccTATATAAgta		aataaa
DBALV-[3RT]	7609	432	603-1034 (+3)	143	16.75	378	1031-1408 (+2)	125	13.94	5745	1408-7152 (+1)	1914	216.73	7469-7475	<56>	7531-7536
	44.2		(atg-tga)				(atg-taa)				(atg-tga)			gtcTATATAAgca		aataaa
DBSNV	7261	432	441-872 (+3)	143	16.78	381	869-1249 (+2)	126	14.05	5664	1246-6909 (+1)	1887	213.99	7113-7119	<74>	7194-7199
	43.1		(atg-tga)				(atg-tga)				(atg-tga)			ctcTATATAAgga		aataaa
