# Supplementary material for: A Sequence-Independent Strategy for Amplification and Characterisation of Episomal Badnavirus Sequences Reveals Three Previously Uncharacterised Yam Badnaviruses
Source: MDPI journal article supplement (doi:10.3390/v8070188), 2016-07-07
Supplement: s1 [file s1 › viruses-08-00188-s001-2.pdf]

# Supplementary Materials: A Sequence-Independent Strategy for Amplification and Characterisation of Episomal Badnavirus Sequences Reveals Three Previously Uncharacterised Yam Badnaviruses

Moritz Bömer, Aliyu A. Turaki, Gonçalo Silva, P. Lava Kumar and Susan E. Seal

|              | 1             | 10                           | 20                    | 30                  | 40        | 50        | 60 |
|--------------|---------------|------------------------------|-----------------------|---------------------|-----------|-----------|----|
| DBSNV        | MNRSIDLEG     | SLKDYLD                      | RSTEPEYLD             | LYIVEKPTNKQLANNLC   | YLNHQAKLL | SRVSLKHFF |    |
| DBALV-[3RT]  | MSRSIDLEK     | TLKDYLD                      | KSTEPEYLD             | DLHTIDRPTTKQLANNLC  | YLNHQAKLL | SRVSLKVFF |    |
| DBALV        | MSRSIDLEK     | TLKDYLD                      | KSTEPEYLD             | LYTVDRPTTKQLANNLC   | YLNHQAKLL | SRVSLKHFF |    |
| DBALV-[2ALa] | MSRSIDLEK     | TLKDYLD                      | KSTEPEYLD             | LYTVDRPTTKQLANNLC   | YLNHQAKLL | SRVSLKHFF |    |
| DBALV-[2ALb] | MSRSIDLEK     | TLKDYLD                      | KSTEPEYLD             | LYTVDRPTTKQLANNLC   | YLNHQAKLL | SRVSLKHFF |    |
| DBRTV1       | MSAIWENSL     | KAYFEG                       | RSTEPEYLD             | LYTVDKPTNKHLLATNLT  | YLNHQEKLF | SKVSLKHFF |    |
| DBRTV1-[3RT] | MSAIWENSL     | KAYFEG                       | RSTEPEYLD             | LYTVDKPTNKHLLATNLT  | YLNHQEKLF | SKVSLKHFF |    |
| DBRTV1-[2RT] | MSAIWENSL     | KAYFEG                       | RSTEPEYLD             | LYTVDKPTNKHLLATNLT  | YLNHQEKLF | SKVSLKHFF |    |
| DBRTV2       | MSVKKWEKSV    | QAYFES                       | HKPELEYLD             | LSLEKPPPKSIAHNLA    | YLNHQEKLF | SKVLLKHLY |    |
| DBRTV2-[3RT] | MSVKKWEKSV    | QAYFES                       | HKPELEYLD             | LSLEKPPPKSIAHNLA    | YLNHQEKLF | SKVLLKHLY |    |
| DBRTV2-[2RT] | MSVKKWEKSV    | QAYFGS                       | HKPELEYLD             | LSLEKPPPKSIAHNLA    | YLNHQEKLF | SKVLLKHLY |    |
|              | 70            | 80                           | 90                    | 100                 | 110       | 120       |    |
| DBSNV        | KLQEEIQEL     | KLTENQVLRKH                  | LVNLTKEVVNRPLTEKKVQEL | LVLRITIEQPKIEQQAVRL | T         |           |    |
| DBALV-[3RT]  | KLQEEIQEL     | KLKAENVKLRKEL                | VNLTKEVVNRPLTERKKVQDL | LVLRITEQPKIEQQAVRL  | V         |           |    |
| DBALV        | KLQEEIQEL     | KLKAENRRLRKD                 | LVNLTKEVVNRPLTEKKVQDL | LVLRITEQPKIEQQAVRL  | V         |           |    |
| DBALV-[2ALa] | KLQEEIQEL     | KLKAENRRLRKD                 | LVNLTKEVVNRPLTEKKVQDL | LVLRITEQPKIEQQAVRL  | V         |           |    |
| DBALV-[2ALb] | KLQEEIQEL     | KLKAENRRLRKD                 | LVNLTKEVVNRPLTEKKVQDL | LVLRITEQPKIEQQAVRL  | V         |           |    |
| DBRTV1       | QLHEEIQEL     | KLKAENKLRKD                  | LVALTREVVNRPLTEKKVQDL | LILKITEQPKIEQQAVRL  | S         |           |    |
| DBRTV1-[3RT] | QLHEEIQEL     | KLKAENKLRKD                  | LVALTREVVNRPLTEKKVQDL | LILKITEQPKIEQQAVRL  | S         |           |    |
| DBRTV1-[2RT] | QLHEEIQEL     | KLKAENKLRKD                  | LVALTREVVNRPLTEKKVQDL | LILKITEQPKIEQQAVRL  | S         |           |    |
| DBRTV2       | TIQEKISELEAEN | KRLRKDLVSLTKEVVNRPLTERKKVQEL | LIVNITSQPKIEQQAVKLS   |                     |           |           |    |
| DBRTV2-[3RT] | TIQEKISELEAEN | KRLRKDLVSLTKEVVNRPLTERKKVQEL | LIVNITSQPKIEQQAVKLS   |                     |           |           |    |
| DBRTV2-[2RT] | TIQEKISELEAEN | KRLRKDLVSLTKEVVNRPLTERKKVQEL | LIVNITSQPKIEQQAVKLS   |                     |           |           |    |
|              | 130           | 140                          |                       |                     |           |           |    |
| DBSNV        | LDLQKLD       | RVEA                         | ILSRLEG               | AVIL                |           |           |    |
| DBALV-[3RT]  | KDLSKLD       | RVEA                         | ILRKVEG               | NTSL                |           |           |    |
| DBALV        | KDLSVLD       | RVEA                         | ILRKVEG               | STSL                |           |           |    |
| DBALV-[2ALa] | KDLSVKLD      | RVEA                         | ILRKVEG               | STSL                |           |           |    |
| DBALV-[2ALb] | KDLSVKLD      | RVEA                         | ILRKVEG               | STSL                |           |           |    |
| DBRTV1       | EDLKKIKL      | ERVE                         | TLKKIEG               | SVLL                |           |           |    |
| DBRTV1-[3RT] | EDLKKIKL      | ERVE                         | TLKKIEG               | SVLL                |           |           |    |
| DBRTV1-[2RT] | EDLKKIKL      | ERVE                         | TLKKIEG               | SVLL                |           |           |    |
| DBRTV2       | KDLQLKLD      | RVED                         | ILRRLEG               | AVTV                |           |           |    |
| DBRTV2-[3RT] | KDLQLKLD      | RVED                         | ILRRLEG               | AVTV                |           |           |    |
| DBRTV2-[2RT] | KDLQLKLD      | RVED                         | ILRRLEG               | AVTV                |           |           |    |

(A)

Figure S1. Cont.

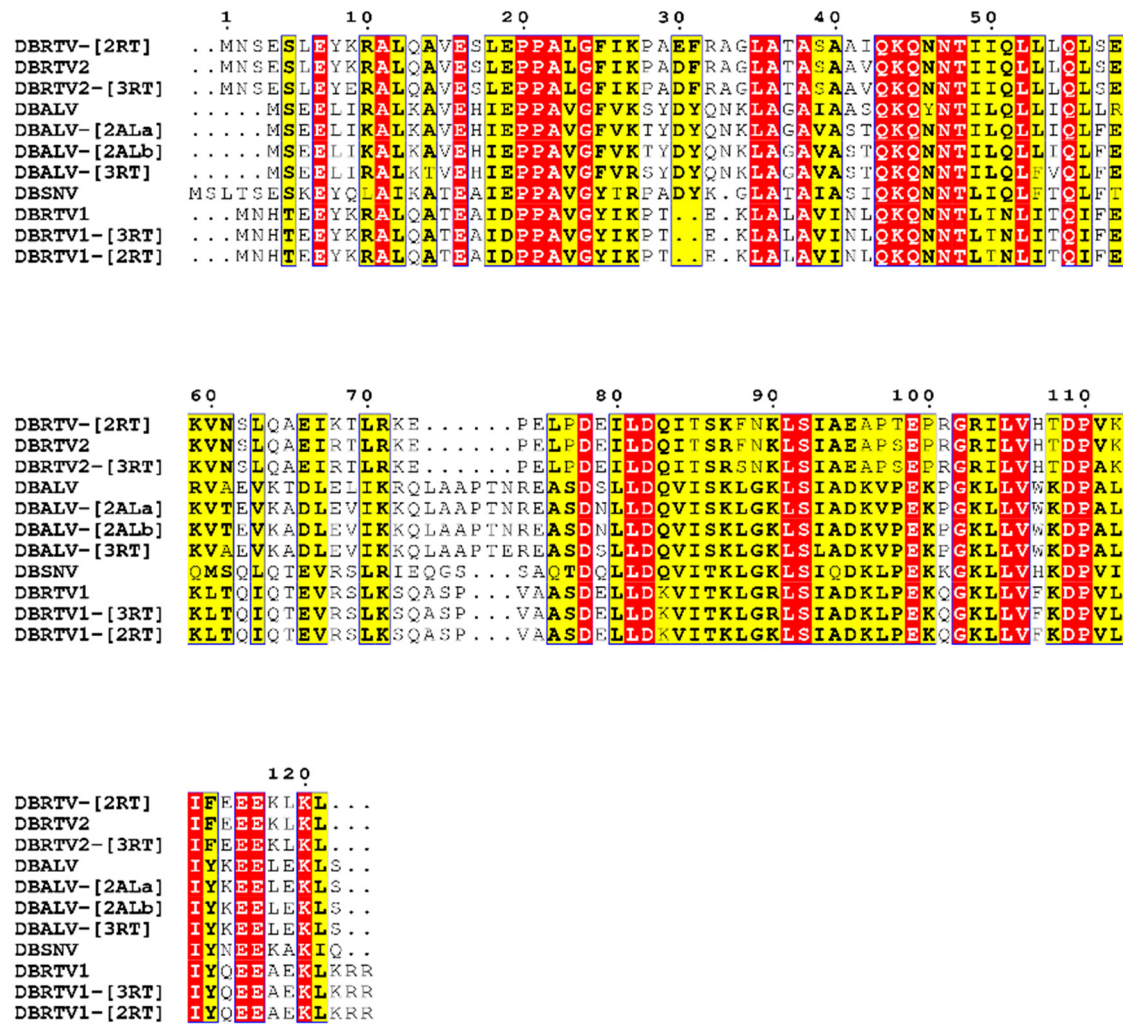

(B)

**Figure S1.** Protein alignment from deduced amino acid sequences of the ORF1 (A) and ORF2 (B) products of DBALV-[2ALa], DBALV-[2ALb], DBRTV1, DBRTV1-[2RT], DBRTV1-[2RT], DBRTV2, DBRTV2-[2RT], DBRTV2-[3RT], DBALV-[3RT], DBALV, DBSNV. Sequences were aligned with CLUSTAL OMEGA (<http://www.ebi.ac.uk/Tools/msa/clustalo/>) and coloured using ESPrnt 3.0 [1], where functional conserved amino acid residues are highlighted with yellow backgrounds and complete consistent residues with red backgrounds.

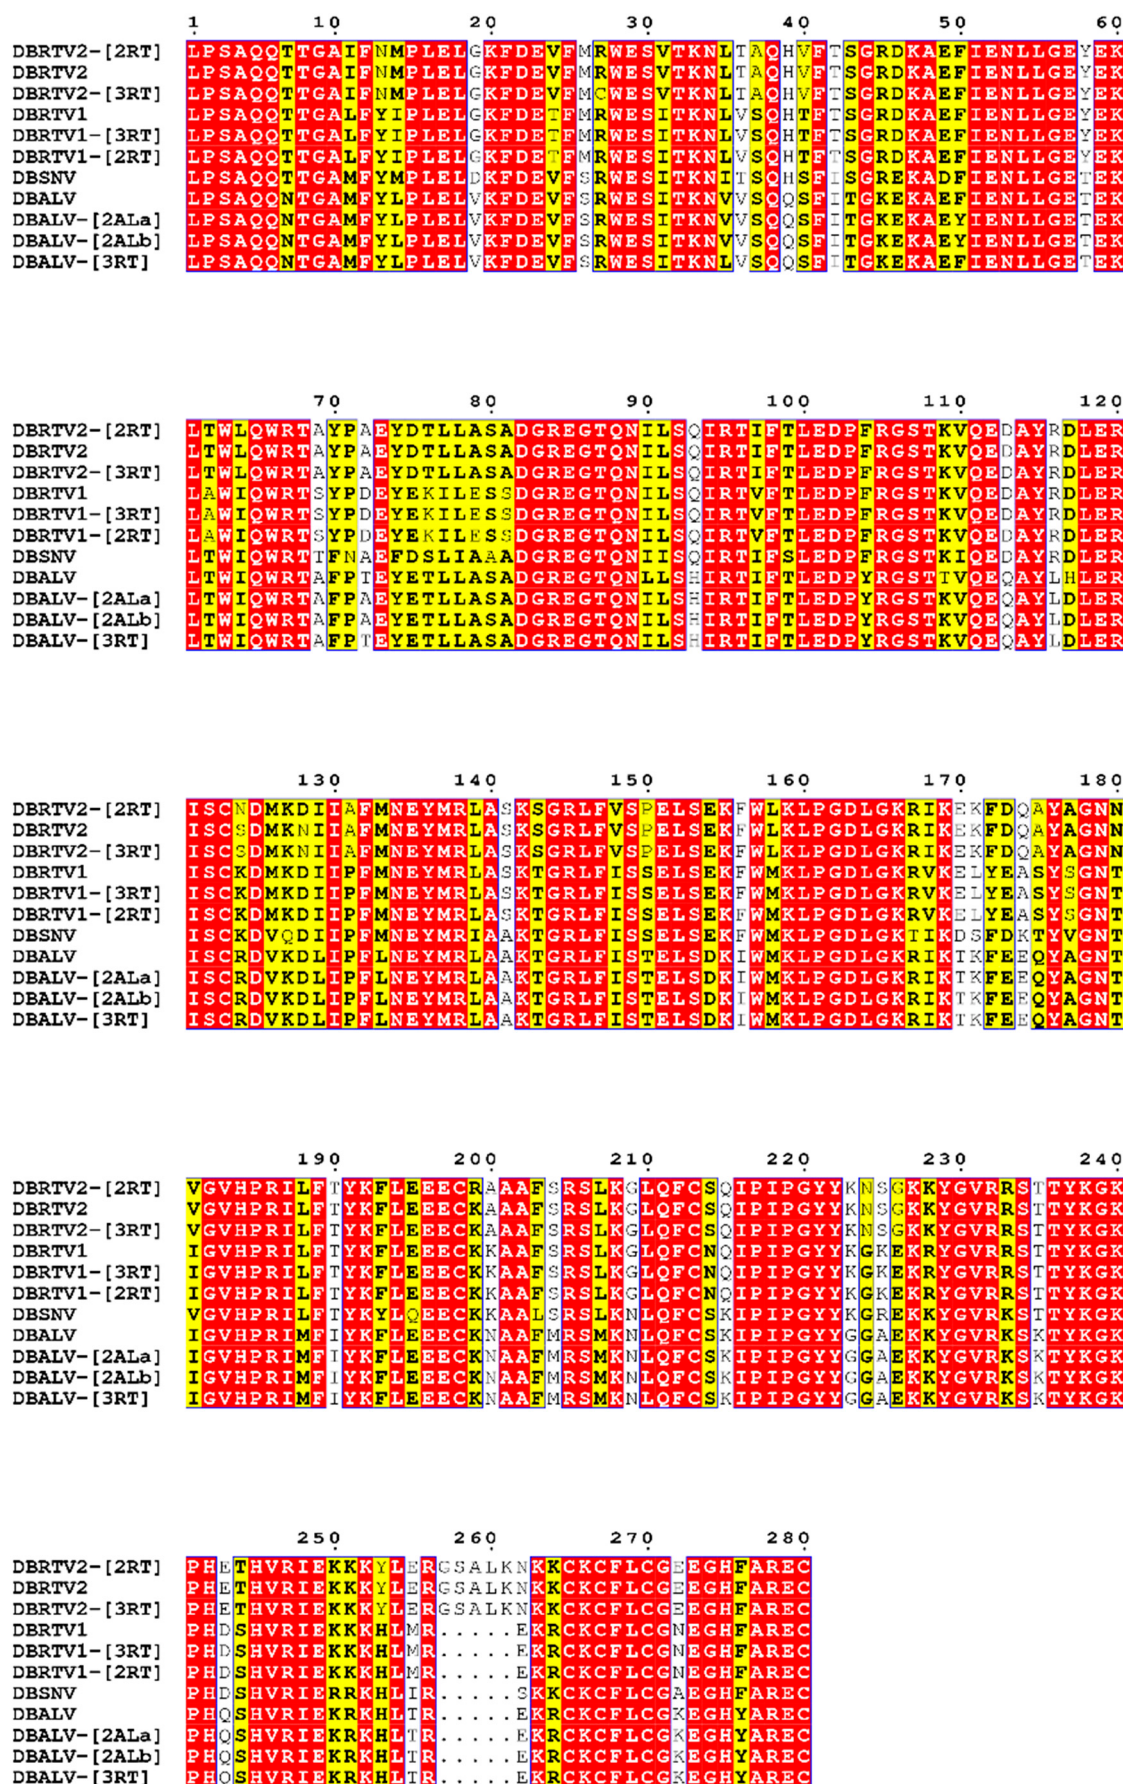

(A)

Figure S2. Cont.

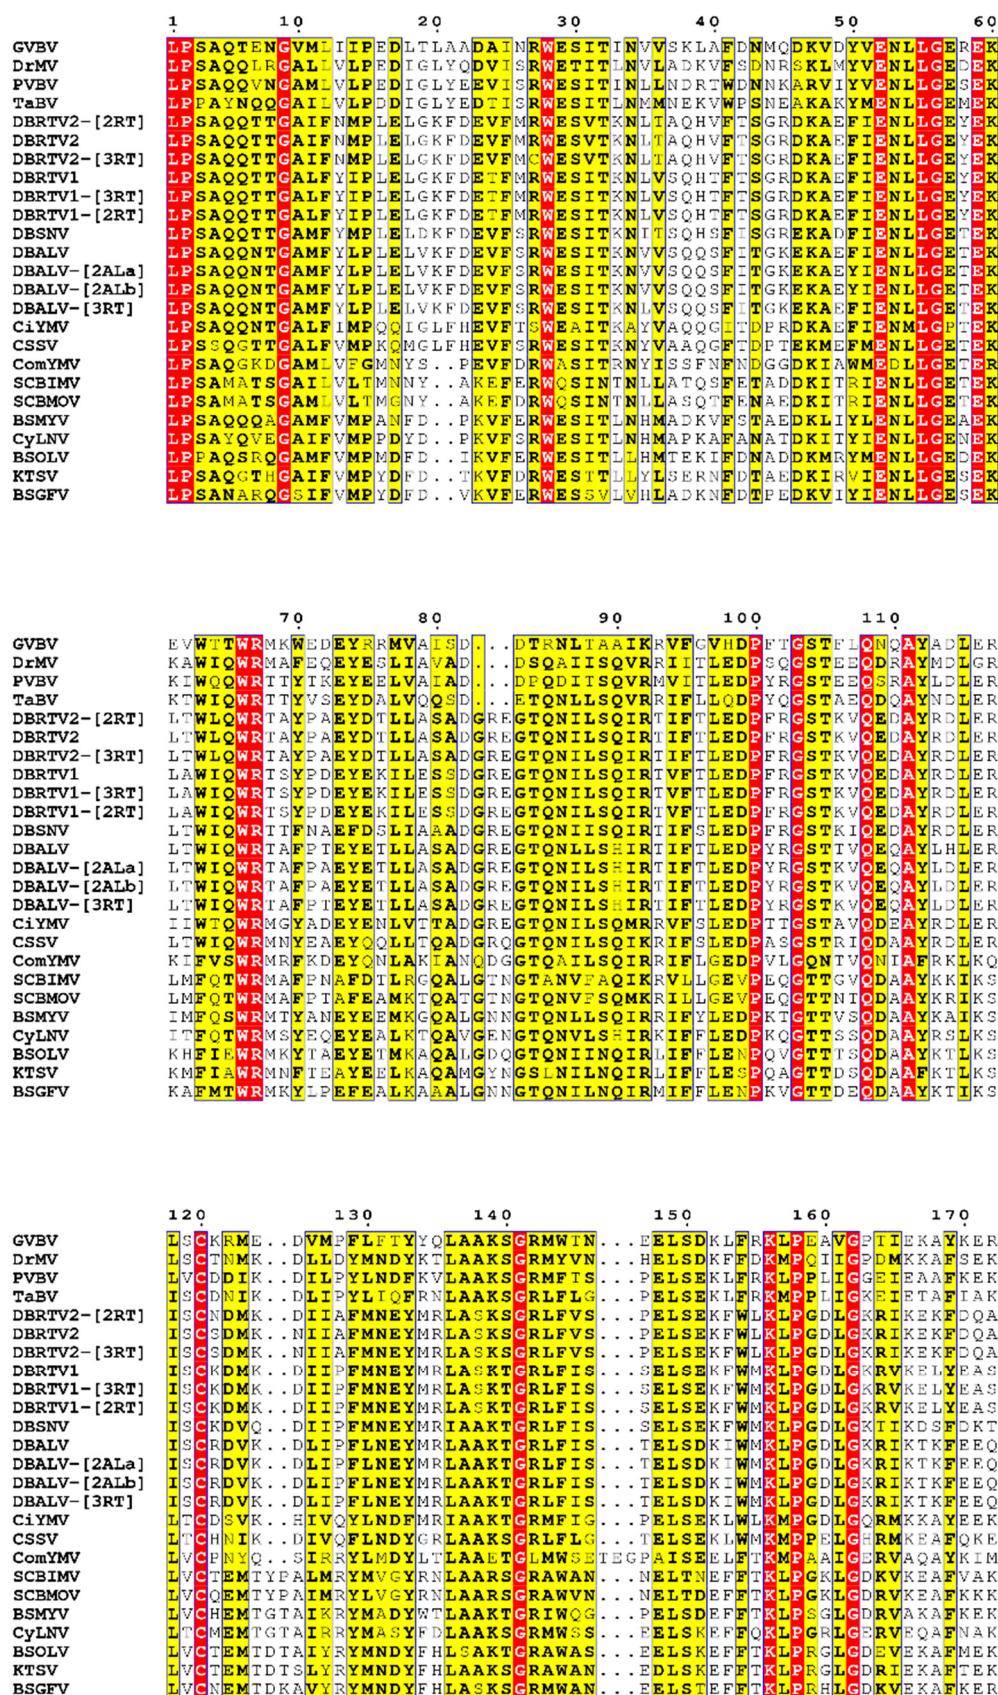

Figure S2. Cont.

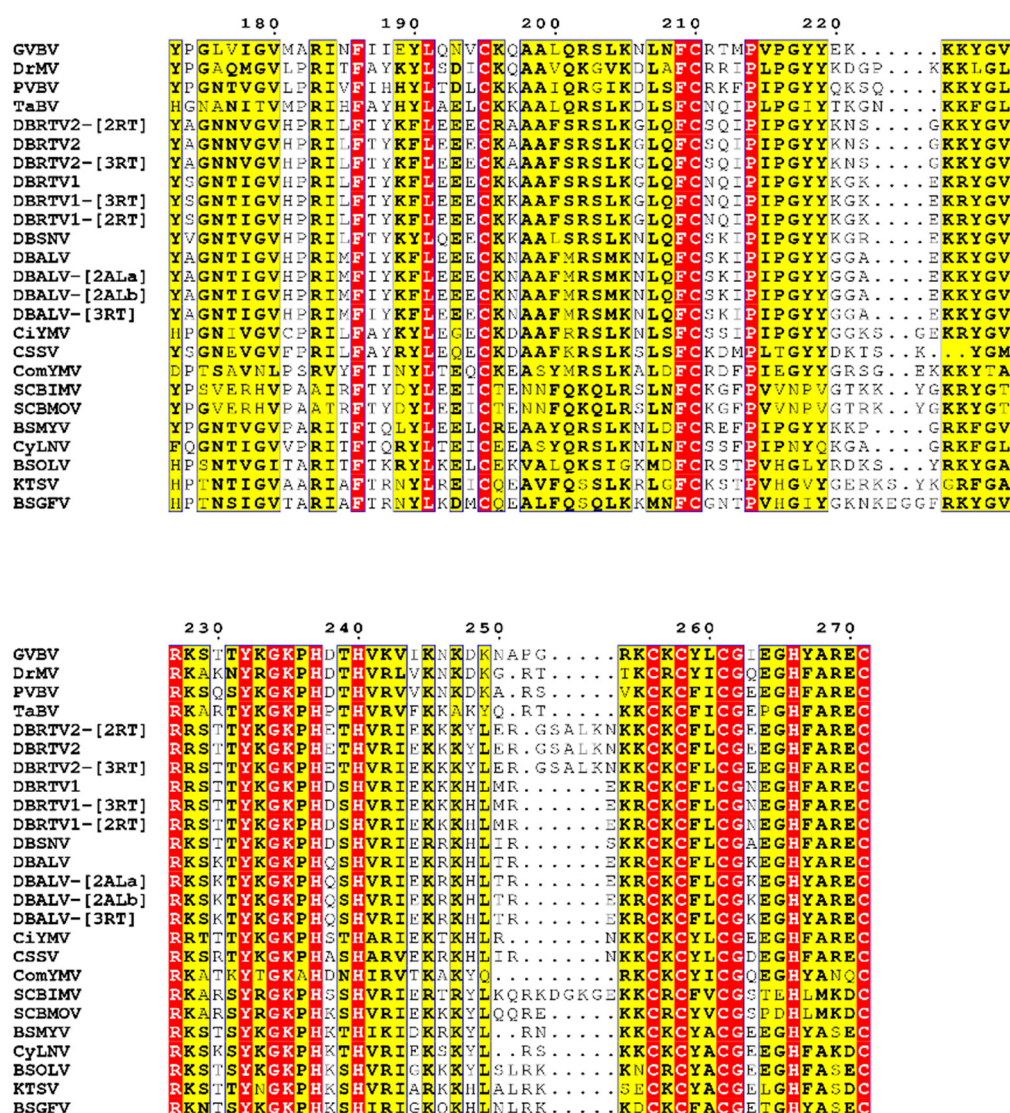

(B)

**Figure S2.** Comparison of highly conserved amino acid residues in the coat protein encoded by the N-terminal half of the ORF 3 product among DBALV-[2ALa], DBALV-[2ALb], DBRTV1, DBRTV1-[2RT], DBRTV1-[2RT], DBRTV2, DBRTV2-[2RT], DBRTV2-[3RT], DBALV-[3RT], DBALV, DBSNV separately (A) and together with 14 badnavirus and other members of the family Caulimoviridae (see text for detail) (B). Sequences were aligned with CLUSTAL OMEGA (<http://www.ebi.ac.uk/Tools/msa/clustalo/>) and coloured using ESPript 3.0 [1], where functional conserved amino acid residues are highlighted with yellow backgrounds and complete consistent residues with red backgrounds.

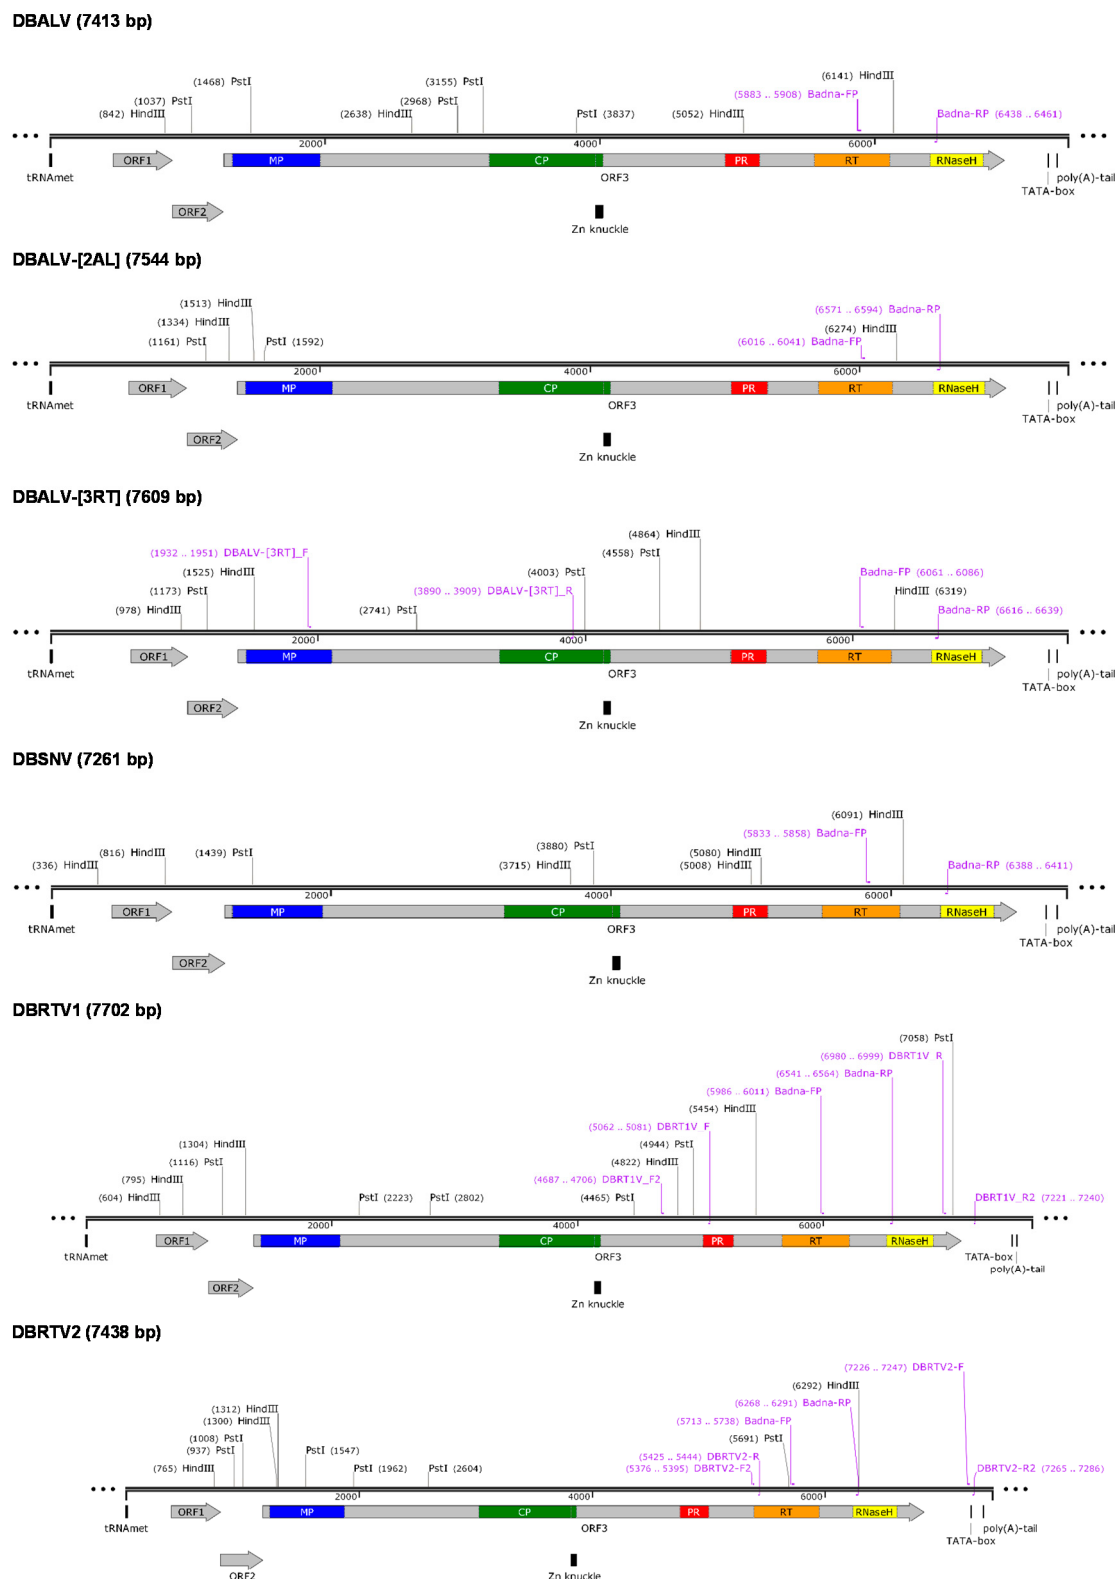

**Figure S3.** Comparative linear representation of DBALV, DBALV-[2AL], DBALV-[3RT], DBSNV, DBRTV1 and DBRTV2 genome showing tRNAMet-binding site; the TATA-box; the putative poly(A)-tail; open reading frame (ORF)1; ORF2; ORF3 with putative movement protein (MP), capsid protein zinc-finger domain (CP and Zn Knuckle), pepsin-like aspartate protease (PR), reverse transcriptase (RT) and RNaseH (RNaseH) motifs; the exact positions of the Badna F/R primers; the DBRTV1, DBRTV2 and DBALV-[3RT] specific primers for PCR amplification of the complete genome and the restriction sites for PstI and HindIII.

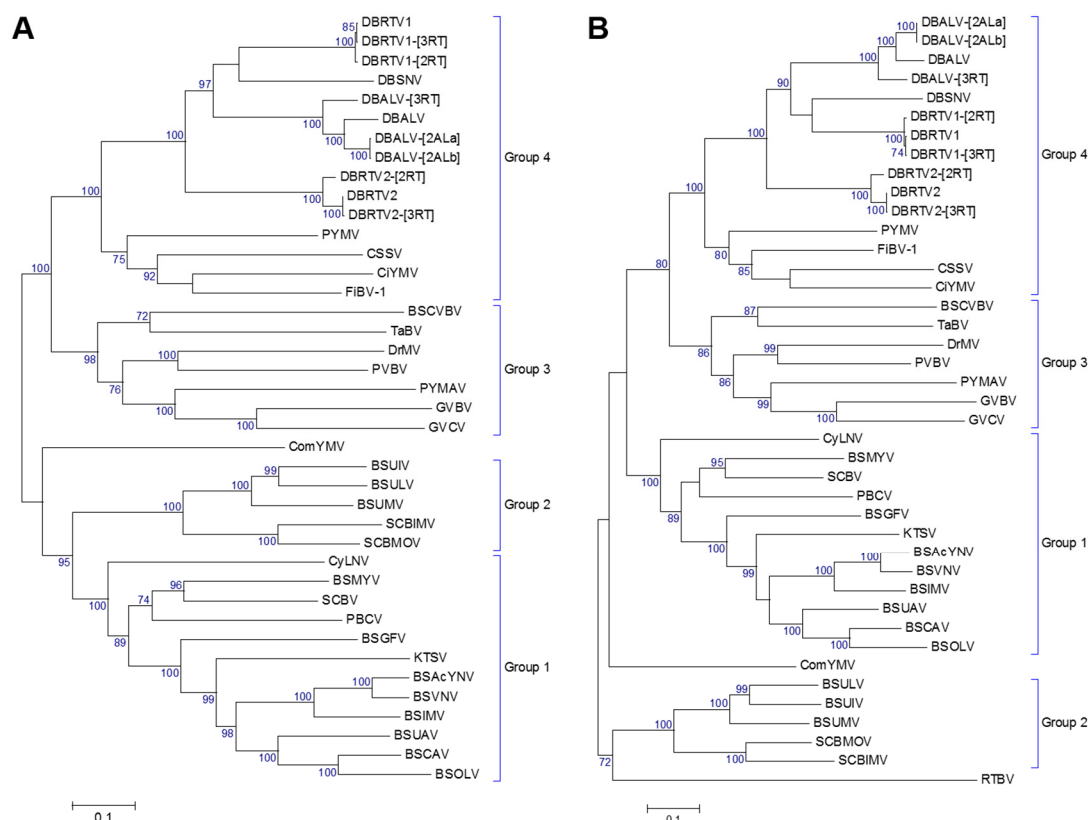

**Figure S4.** Maximum Likelihood phylogenetic trees obtained from alignments of the complete genomic sequences (**A**) and the nucleotide sequences of the ORF3 products (**B**) of DBALV-[2ALa], DBALV-[2ALb], DBRTV1, DBRTV1-[2RT], DBRTV1-[2RT], DBRTV2, DBRTV2-[2RT], DBRTV2-[3RT], DBALV-[3RT], DBALV, DBSNV, other badnaviruses and related viruses (see text for detail); The phylogenetic tree of the ORF3 nucleotide sequences was rooted to the nucleotide sequence of the polypeptide of RTBV (**B**). The topologies of the trees support the separation of the four major groups depicted by Wang et al. [2]. The bootstrap analysis of the sequences was 1000 replicates and the cut-off value was 70%.

## References

1. Robert, X.; Gouet, P. Deciphering key features in protein structures with the new ENDscript server. *Nucleic Acids Res.* **2014**, *42*, 320–324.
2. Wang, Y.; Cheng, X.; Wu, X.; Wang, A.; Wu, X. Characterization of complete genome and small RNA profile of pagoda yellow mosaic associated virus, a novel badnavirus in China. *Virus Res.* **2014**, *188*, 103–108.

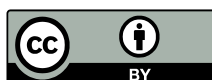

© 2016 by the authors. Submitted for possible open access publication under the terms and conditions of the Creative Commons Attribution (CC-BY) license (<http://creativecommons.org/licenses/by/4.0/>).
